# Supplementary material for: A Straightforward Method for the Development of Positively Charged Gold Nanoparticle-Based Vectors for Effective siRNA Delivery
Source: MDPI journal article supplement (doi:10.3390/molecules28083318), 2023-04-08
Supplement: s1 [file s1]

# **A Straightforward Method for the Development of Positively Charged Gold Nanoparticle-Based Vectors for Effective siRNA Delivery**

**Tatiana N. Elizarova<sup>1</sup>, Maxim L. Antopolsky<sup>1</sup>, Denis O. Novichikhin<sup>1,2</sup>, Artemiy M. Skirda<sup>1,2</sup>, Alexey V. Orlov<sup>1,\*</sup>, Vera A. Bragina<sup>1</sup> and Petr I. Nikitin<sup>1,2,\*</sup>**

<sup>1</sup> Prokhorov General Physics Institute, Russian Academy of Sciences, 119991 Moscow, Russia

<sup>2</sup> National Research Nuclear University MEPhI (Moscow Engineering Moscow Engineering Physics Institute (MEPI), National Research Nuclear University, 115409 Moscow, Russia

\* Correspondence: alexey.orlov@kapella.gpi.ru (A.V.O.); nikitin@kapella.gpi.ru (P.I.N.)

## Table of content:

|                                                                         |   |
|-------------------------------------------------------------------------|---|
| Table S1. Statistical analysis for the data presented in Figure 3.....  | 2 |
| Table S2. Statistical analysis for the data presented in Figure 4.....  | 2 |
| Table S3. Statistical analysis for the data presented in Figure 5a..... | 2 |
| Table S4. Statistical analysis for the data presented in Figure 5b..... | 3 |

Table S1. Statistical analysis for the data presented in Figure 3. SEAP production by SEAP-ARPE-19 cells 6 h, 24 h and 48 h post-transfection with CPP-AuNPs in Opti-MEM

| Time of SEAP measurement | Dose of CPP/AuNPs added ( $\mu\text{g}$ ) | Number of measurements | Mean (LU) | Upper limit (LU) | Lower limit (LU) |
|--------------------------|-------------------------------------------|------------------------|-----------|------------------|------------------|
| 6 h                      | 0                                         | 5                      | 10750     | 800              | 100              |
| 6 h                      | 12                                        | 5                      | 16500     | 100              | 50               |
| 6h                       | 28                                        | 5                      | 19300     | 500              | 100              |
| 6 h                      | 40                                        | 5                      | 20800     | 300              | 100              |
| 24 h                     | 0                                         | 5                      | 37400     | 350              | 150              |
| 24 h                     | 12                                        | 5                      | 39500     | 1050             | 200              |
| 24 h                     | 28                                        | 5                      | 48200     | 750              | 200              |
| 24 h                     | 40                                        | 5                      | 49500     | 1200             | 150              |
| 48 h                     | 0                                         | 5                      | 12500     | 900              | 100              |
| 48 h                     | 12                                        | 5                      | 15200     | 650              | 50               |
| 48 h                     | 28                                        | 5                      | 12000     | 100              | 100              |
| 48 h                     | 40                                        | 5                      | 9500      | 300              | 200              |

Table S2. Statistical analysis for the data presented in Figure 4. SEAP secretion by SEAP-ARPE-19 cells 24 h post-transfection

| Dose of siRNA/CPP-AuNPs complex added ( $\mu\text{g}$ ) | Number of measurements | Mean (LU) | Upper limit (LU) | Lower limit (LU) |
|---------------------------------------------------------|------------------------|-----------|------------------|------------------|
| 0/0                                                     | 7                      | 29700     | 600              | 100              |
| 0.1/4                                                   | 7                      | 36200     | 700              | 200              |
| 0.3/12                                                  | 7                      | 46500     | 500              | 100              |
| 0.5/20                                                  | 7                      | 23200     | 400              | 200              |
| 0.7/28                                                  | 7                      | 17300     | 300              | 100              |

Table S3. Statistical analysis for the data presented in Figure 5a. Cell viability 48 h post-transfection in serum-free medium Opti-MEM.

| Compounds added | Dose, $\mu\text{g}$ | Number of measurements | Mean (%) | Upper limit (%) | Lower limit (%) |
|-----------------|---------------------|------------------------|----------|-----------------|-----------------|
| CPP             | 4                   | 5                      | 83       | 3               | 0.5             |
| CPP             | 12                  | 5                      | 86       | 5               | 1               |
| CPP             | 28                  | 5                      | 17       | 4               | 1               |
| CPP-AuNP        | 12                  | 5                      | 95       | 3               | 1               |
| CPP-AuNP        | 28                  | 5                      | 107      | 6               | 2               |
| siRNA/CPP       | 12                  | 5                      | 100      | 2               | 1               |
| siRNA/CPP       | 28                  | 5                      | 16       | 3               | 1               |
| siRNA/CPP-AuNP  | 12                  | 5                      | 86       | 5               | 2               |
| siRNA/CPP-AuNP  | 28                  | 5                      | 105      | 4               | 1               |

Table S4. Statistical analysis for the data presented in Figure 5b. Cell viability 48 h post-transfection in serum-containing medium DMEM/F-12.

| Compounds added | Eq. dose of CPP, $\mu\text{g}$ | Number of measurments | Mean (%) | Upper limit (%) | Lower limit (%) |
|-----------------|--------------------------------|-----------------------|----------|-----------------|-----------------|
| CPP             | 4                              | 5                     | 78       | 6               | 2               |
| CPP             | 12                             | 5                     | 102      | 4               | 1               |
| CPP             | 28                             | 5                     | 42       | 3               | 1               |
| CPP-AuNP        | 12                             | 5                     | 106      | 5               | 2               |
| CPP-AuNP        | 28                             | 5                     | 100      | 3               | 0               |
| siRNA/CPP       | 12                             | 5                     | 105      | 3               | 1               |
| siRNA/CPP       | 28                             | 5                     | 43       | 4               | 2               |
| siRNA/CPP-AuNP  | 12                             | 5                     | 127      | 3               | 2               |
| siRNA/CPP-AuNP  | 28                             | 5                     | 168      | 5               | 1               |
